# Supplementary material
Source: publisher figshare collection journal article supplement (https://plos.figshare.com/articles/dataset/_/5790033)
Supplement: Supplementary file [file 1]

# Modelling the Large-scale Yellow Fever Outbreak in Luanda, Angola, and the Impact of Vaccination

Shi Zhao<sup>1</sup>, Lewi Stone<sup>2,3,\*</sup>, Daozhou Gao<sup>4</sup> & Daihai He<sup>1,\*</sup>

**1** Department of Applied Mathematics, Hong Kong Polytechnic University, Hong Kong, China

**2** School of Mathematical and Geospatial Sciences, RMIT University, Melbourne, 3000, Australia

**3** Biomathematics Unit, Department of Zoology, Tel Aviv University, Ramat Aviv, Israel

**4** Department of Mathematics, Shanghai Normal University, Shanghai, China

\* Corresponding: D.H. daihai.he@polyu.edu.hk & L.S. lewistone100@gmail.com

## S7 Assuming deaths were under-reported (CFR=15%)

To further test the robustness of our conclusion, we assume that deaths were under-reported. We assume the “actual” YF-related deaths were double the confirmed deaths, so that the “actual” death toll is  $2 \times 73 = 146$ . We then set the CFR = 15%, which is in line with previous studies in Africa (see “*the historic estimate of 200,000 cases and 30,000 deaths annually, which was based on serological survey data obtained from children in Nigeria between 1945 and 1971*” in [1]). Results are summarized in Fig. S7 and Tables S7 and S8. Our key conclusions still hold, namely the deaths prevented are approximately 5,6-fold times the reported “actual” death toll.

**Table S7. Impacts of vaccination campaign delay under weak infectivity scenario and CFR = 15%.**

| Scenario       | Total reported cases  | Total deaths       |
|----------------|-----------------------|--------------------|
| Observed       | 941                   | 146                |
| Baseline model | 938 [ 486 , 1669 ]    | 149 [ 76 , 264 ]   |
| 60 days delay  | 3425 [ 1736 , 6168 ]  | 538 [ 263 , 962 ]  |
| 120 days delay | 5906 [ 2829 , 10529 ] | 917 [ 450 , 1678 ] |
| 180 days delay | 6266 [ 3104 , 11220 ] | 957 [ 481 , 1684 ] |

**Table S8. Impacts of vaccination campaign delay under strong infectivity scenario and CFR = 15%.**

| Scenario       | Total reported cases  | Total deaths       |
|----------------|-----------------------|--------------------|
| Observed       | 941                   | 146                |
| Baseline model | 896 [ 431 , 1611 ]    | 148 [ 69 , 271 ]   |
| 60 days delay  | 3325 [ 1579 , 5846 ]  | 538 [ 250 , 984 ]  |
| 120 days delay | 5508 [ 2676 , 9995 ]  | 910 [ 443 , 1618 ] |
| 180 days delay | 6146 [ 2932 , 11034 ] | 978 [ 450 , 1779 ] |

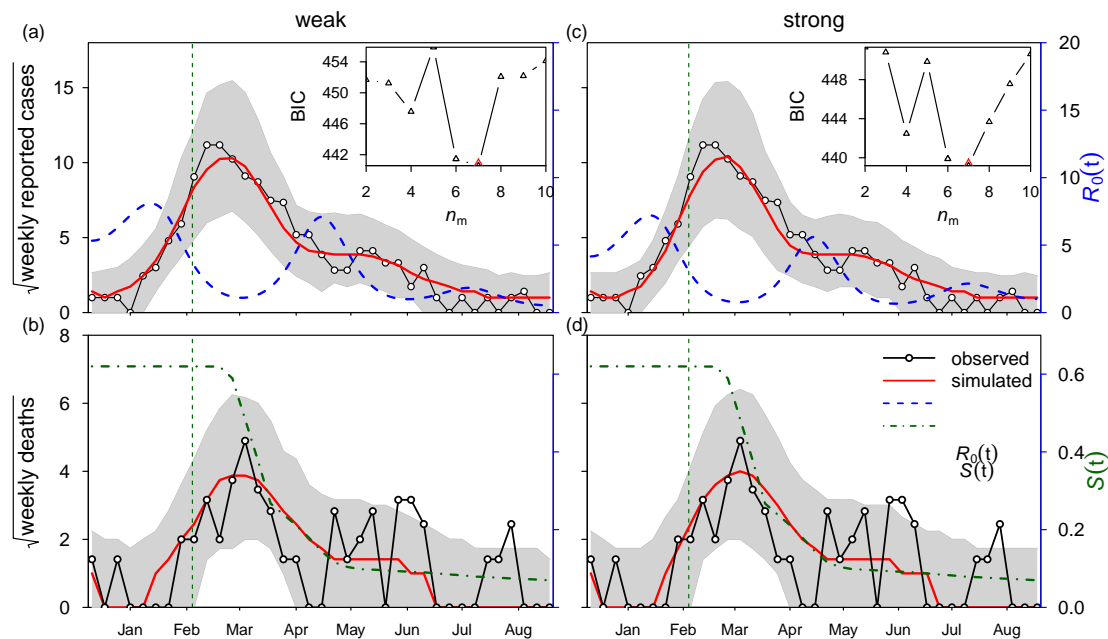

**Fig S7.** Fitting a model with mocked deaths data and CFR = 15%

## References

1. Garske T, Van Kerkhove MD, Yactayo S, Ronveaux O, Lewis RF, Staples JE, ... & Yellow Fever Expert Committee. Yellow Fever in Africa: estimating the burden of disease and impact of mass vaccination from outbreak and serological data. PLoS Med. 2014;11(5), e1001638.
