# Supplementary material
Source: publisher figshare collection journal article supplement (https://plos.figshare.com/articles/dataset/_/5790033)
Supplement: Supplementary file [file 1]

# Modelling the Large-scale Yellow Fever Outbreak in Luanda, Angola, and the Impact of Vaccination

Shi Zhao<sup>1</sup>, Lewi Stone<sup>2,3,\*</sup>, Daozhou Gao<sup>4</sup> & Daihai He<sup>1,\*</sup>

**1** Department of Applied Mathematics, Hong Kong Polytechnic University, Hong Kong, China

**2** School of Mathematical and Geospatial Sciences, RMIT University, Melbourne, 3000, Australia

**3** Biomathematics Unit, Department of Zoology, Tel Aviv University, Ramat Aviv, Israel

**4** Department of Mathematics, Shanghai Normal University, Shanghai, China

\* Corresponding: D.H. daihai.he@polyu.edu.hk & L.S. lewistone100@gmail.com

## S3 Basic Reproduction Number

Here we derive the basic reproductive number  $\mathcal{R}_0$  for the vector-host model Eqn 1. Following standard procedures [1,2], the rate of transmission (i.e., the changing rates from infectious to non-infectious classes) is given by,  $\mathcal{F}$ :

$$\mathcal{F} = \begin{pmatrix} ab \frac{I_v}{N_h} S_h \\ 0 \\ 0 \\ ac \frac{\psi A_h + I_h}{N_h} S_v \\ 0 \end{pmatrix}$$

and the rate of transition (i.e., the changing rates among infectious classes),  $\mathcal{V}$ :

$$\mathcal{V} = \begin{pmatrix} \sigma_h E_h \\ (\delta - 1)\sigma_h E_h + \gamma_h A_h \\ -\delta\sigma_h E_h + \gamma_h I_h \\ (\sigma_v + \mu_v)E_v \\ -\sigma_v E_v + \mu_v I_v \end{pmatrix}$$

Then, we have two Jacobian matrices, of which  $F$  is the Jacobian of  $\mathcal{F}$  and  $V$  is the Jacobian of  $\mathcal{V}$ , and we derive  $F$  and  $V$  under the disease free equilibrium [1] (DFE, by setting the proportions of susceptible classes to be 100%),

$$F = \begin{pmatrix} 0 & 0 & 0 & 0 & ab \\ 0 & 0 & 0 & 0 & 0 \\ 0 & 0 & 0 & 0 & 0 \\ 0 & ac\psi m & acm & 0 & 0 \\ 0 & 0 & 0 & 0 & 0 \end{pmatrix} \quad (\text{S3})$$

where  $F_{i,j} = \frac{\partial \mathcal{F}_i}{\partial x_j}$  with  $\mathcal{F}_i$  is the  $i$ -th equation of  $\mathcal{F}$  and  $x_j$  is the  $j$ -th variable of the vector  $(E_h, A_h, I_h, E_v, I_v)$ ,

$$V = \begin{pmatrix} \sigma_h & 0 & 0 & 0 & 0 \\ (\delta - 1)\sigma_h & \gamma_h & 0 & 0 & 0 \\ -\delta\sigma_h & 0 & \gamma_h & 0 & 0 \\ 0 & 0 & 0 & (\sigma_v + \mu_v) & 0 \\ 0 & 0 & 0 & -\sigma_v & \mu_v \end{pmatrix} \quad (S4)$$

where  $V_{i,j} = \frac{\partial \mathcal{V}_i}{\partial x_j}$  with  $\mathcal{V}_i$  is the  $i$ -th equation of  $\mathcal{V}$  and  $x_j$  is the  $j$ -th variable of the vector  $(E_h, A_h, I_h, E_v, I_v)$ . Then, we have the next generation matrix of our model,

$$FV^{-1} = \begin{pmatrix} 0 & 0 & 0 & \frac{ab\sigma_v}{\mu_v(\sigma_v + \mu_v)} & \frac{ab}{\mu_v} \\ 0 & 0 & 0 & 0 & 0 \\ 0 & 0 & 0 & 0 & 0 \\ \frac{acm}{\gamma_h} \cdot (\psi + \delta - \psi\delta) & \frac{acm}{\gamma_h} \cdot \psi & \frac{acm}{\gamma_h} & 0 & 0 \\ 0 & 0 & 0 & 0 & 0 \end{pmatrix} \quad (S5)$$

Since  $\mathcal{R}_0$  is the spectral radius of  $FV^{-1}$  [1], the basic reproduction number is

$$\mathcal{R}_0 = \sqrt{(\psi + \delta - \psi\delta) \cdot \frac{a^2bcm}{\gamma_h} \cdot \frac{\sigma_v}{\mu_v(\sigma_v + \mu_v)}} \quad (S6)$$

where  $m$  is the ratio of mosquito-to-human population.

## References

1. van den Driessche P, Watmough J. Reproduction numbers and sub-threshold endemic equilibria for compartmental models of disease transmission. *Math Biosci.* 2002;180:29-48.
2. Brauer F, Castillo-Chavez C, Mubayi A, Towers S. Some models for epidemics of vector-transmitted diseases. *Infectious Disease Modelling.* 2016;1:79-87.
