# Supplementary material
Source: publisher figshare collection journal article supplement (https://plos.figshare.com/articles/dataset/_/5790033)
Supplement: Supplementary file [file 1]

# Modelling the Large-scale Yellow Fever Outbreak in Luanda, Angola, and the Impact of Vaccination

Shi Zhao<sup>1</sup>, Lewi Stone<sup>2,3,\*</sup>, Daozhou Gao<sup>4</sup> & Daihai He<sup>1,\*</sup>

**1** Department of Applied Mathematics, Hong Kong Polytechnic University, Hong Kong, China

**2** School of Mathematical and Geospatial Sciences, RMIT University, Melbourne, 3000, Australia

**3** Biomathematics Unit, Department of Zoology, Tel Aviv University, Ramat Aviv, Israel

**4** Department of Mathematics, Shanghai Normal University, Shanghai, China

\* Corresponding: D.H. daihai.he@polyu.edu.hk & L.S. lewistone100@gmail.com

## S4 Estimating the Confidence Interval of $\mathcal{R}_0(t)$

Figs. S4 and S5 show the 95% confidence interval (CI) for the estimated  $\mathcal{R}_0$ , obtained by calculating the 95% CI of  $m(t)$ , which is obtained from calculating the profile maximum log likelihood of the model as a function of value of each node of  $m(t)$ . The width of the CI became very wide in the last 2/7 (i.e., 28.57%) of the study period because both case numbers and the number of deaths became relatively small and noisy.

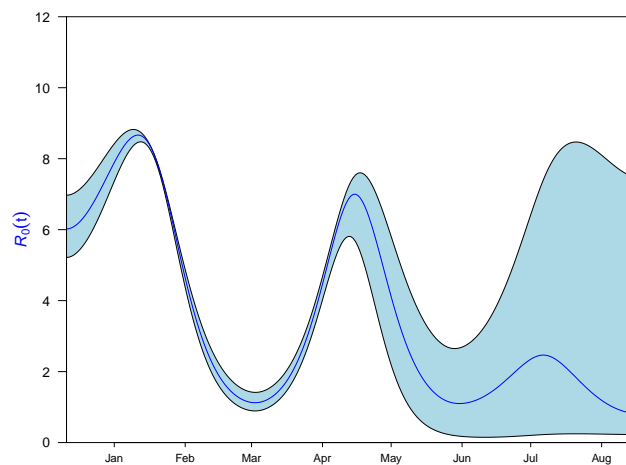

**Fig S4.** The Confidence Interval (C.I.) estimation plot of  $\mathcal{R}_0$  under scenario 1.

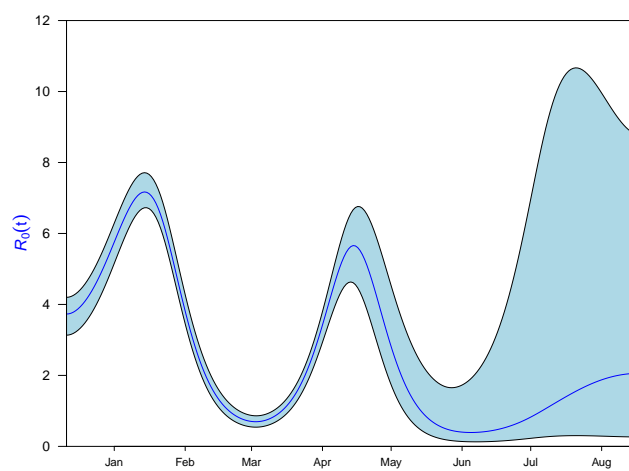

**Fig S5.** The Confidence Interval (C.I.) estimation plot of  $\mathcal{R}_0$  under scenario 2.
